# Supplementary material
Source: publisher figshare collection journal article supplement (https://gsajournals.figshare.com/ndownloader/files/12961835)
Supplement: Supplementary file 1 [file 12961835]

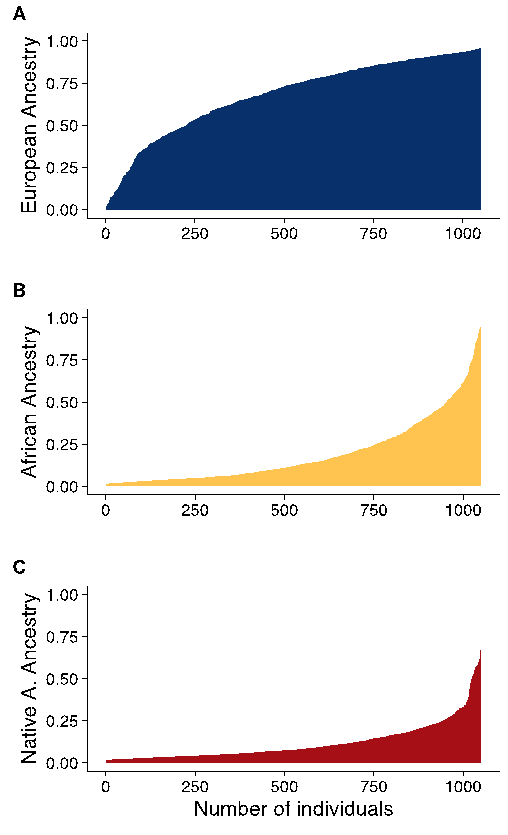


**Figure S1**. Graphic representation of the individual interethnic admixture estimate in an admixed population from São Paulo, using R software, for k=3. X-axis represents the number of individuals and Y-axis represents the proportion of correspondent ancestry: European (blue), African (yellow) and Native American (red).
